# Supplementary material for: A UV-responsive pressure sensitive adhesive for damage-free fabrication of an ultrathin imperceptible mechanical sensor with ultrahigh optical transparency
Source: Royal Society of Chemistry journal article supplement (doi:10.1039/c9ta04634h), 2019-01-01
Supplement: c9ta04634h1.pdf [file c9ta04634h1.pdf]

**UV-responsive pressure sensitive adhesive for damage-free  
fabrication of ultrathin imperceptible mechanical sensor with  
ultrahigh optical transparency**

Sang-Woo Kim,<sup>1,†</sup> Yun Hee Ju,<sup>2,†</sup> Sangmoon Han,<sup>2</sup> Jin Soo Kim,<sup>2</sup> Hee-Jin Lee,<sup>3</sup> Chul  
Jong Han,<sup>3</sup> Cheul-Ro Lee,<sup>2</sup> Seung-Boo Jung,<sup>4,\*</sup> Youngmin Kim<sup>3,\*</sup> and Jong-Woong  
Kim<sup>2,\*</sup>

<sup>1</sup>SKKU Advanced Institute of Nano Technology, Sungkyunkwan University, 300  
Cheoncheon-dong, Jangan-gu, Suwon 440-746, Republic of Korea

<sup>2</sup>School of Advanced Materials Engineering, Chonbuk National University, 567  
Baekje-daero, Deokjin-gu, Jeonju 54896, Republic of Korea

<sup>3</sup>Display Materials & Components Research Center, Korea Electronics Technology  
Institute, Seongnam 13509, Republic of Korea

<sup>4</sup>School of Advanced Materials Science & Engineering, Sungkyunkwan University,  
300 Cheoncheon-dong, Jangan-gu, Suwon 440-746, Republic of Korea

\*Phone: +82 31 290 7359, E-mail: sbjung@skku.edu (S.-B. Jung)

\*Phone: +82 31 789 7432, E-mail: ymkim@keti.re.kr (Y. Kim)

\*Phone: +82 63 270 2292, E-mail: wyjd@jbnu.ac.kr (J.-W. Kim)

<sup>†</sup>These authors contributed equally to this work.

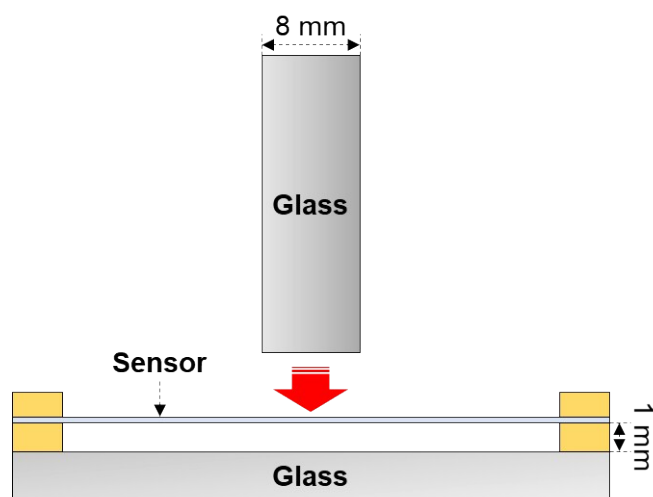

**Fig. S1.** Schematic setup of the pressing test.

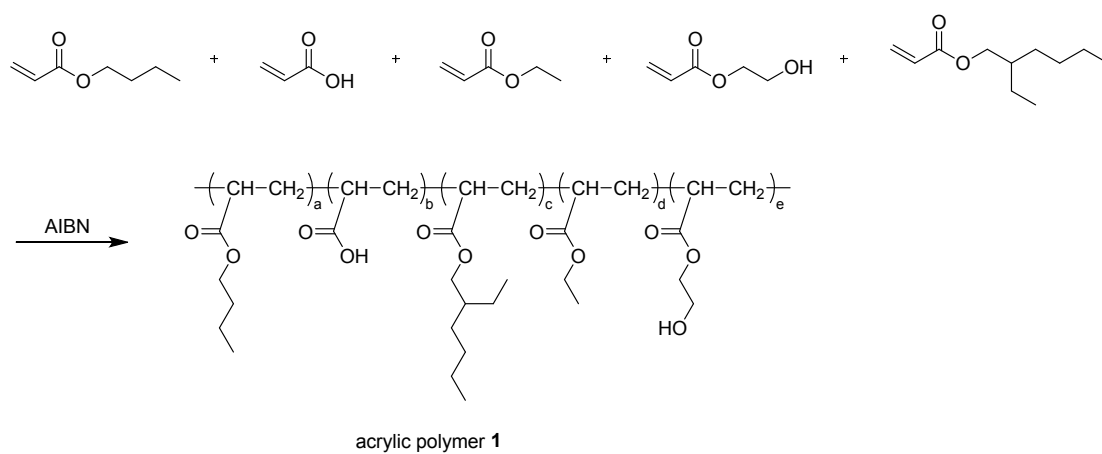

**Fig. S2.** Synthesis of acrylic polymer 1.

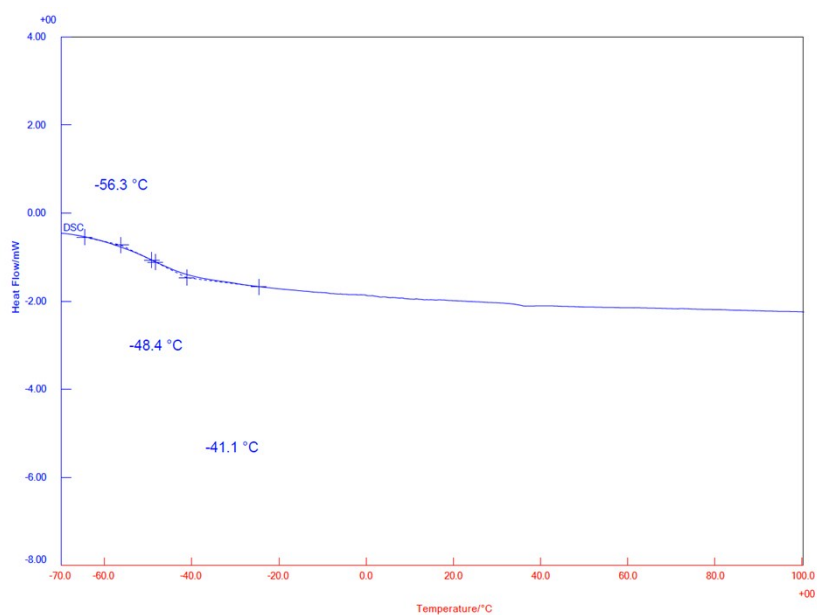

**Fig. S3.** DSC curve for acrylic polymer **1** measured in the range -70 °C to 100 °C.

| monomers           | 2-ethylhexyl<br>acrylate | butyl acrylate | ethyl acrylate | 2-<br>hydroxyethyl<br>acrylate | acrylic acid |
|--------------------|--------------------------|----------------|----------------|--------------------------------|--------------|
| Mass fraction      | 0.300                    | 0.439          | 0.200          | 0.001                          | 0.060        |
| T <sub>g</sub> (K) | 223                      | 219            | 249            | 258                            | 378          |

$$\frac{1}{T_g} = \frac{0.300}{223} + \frac{0.439}{219} + \frac{0.200}{249} + \frac{0.001}{258} + \frac{0.060}{378}$$

$$T_g = 232 \text{ K} \rightarrow T_g = -41 \text{ °C}$$

**Fig. S4.** Calculation of T<sub>g</sub> by Fox equation.

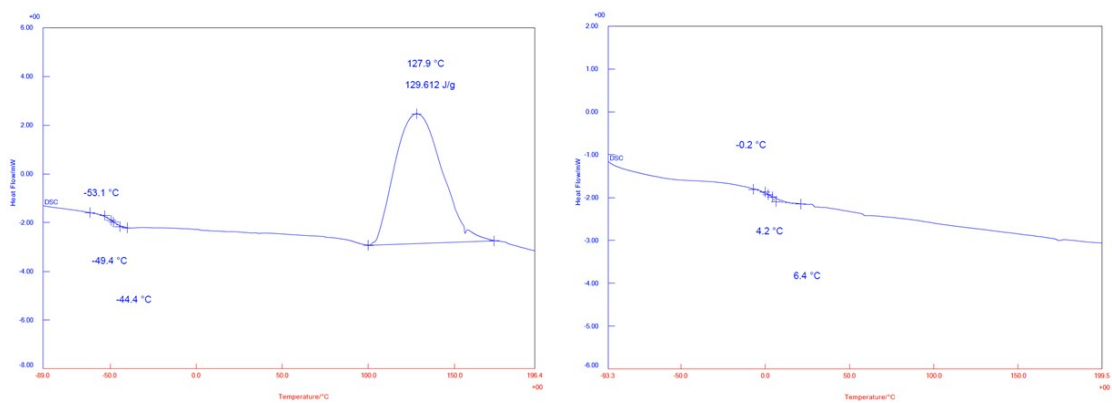

**Fig. S5.** DSC curves for polyurethane acrylate **2** during (left) the first heating cycle and (right) second heating cycle.

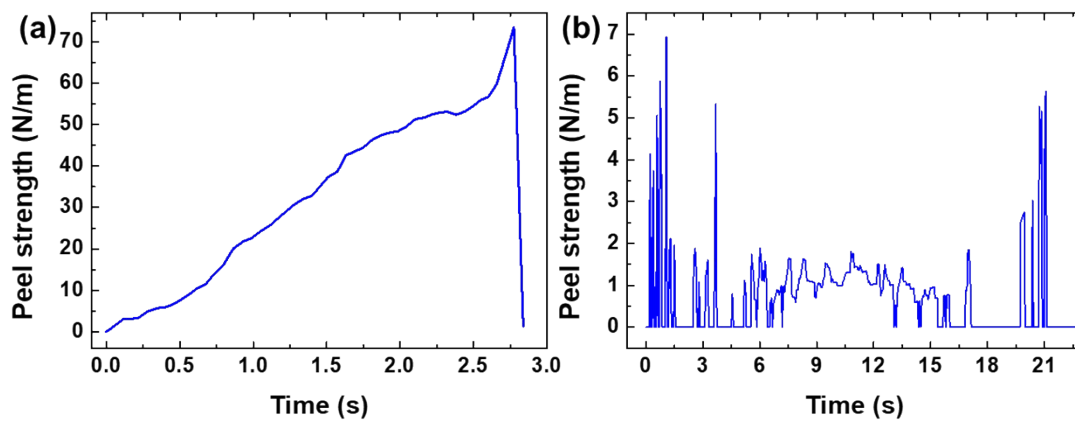

**Fig. S6.** Strength-time curves of UVC-PSA tapes obtained with loop tack test (left) before and (right) after UV irradiation.

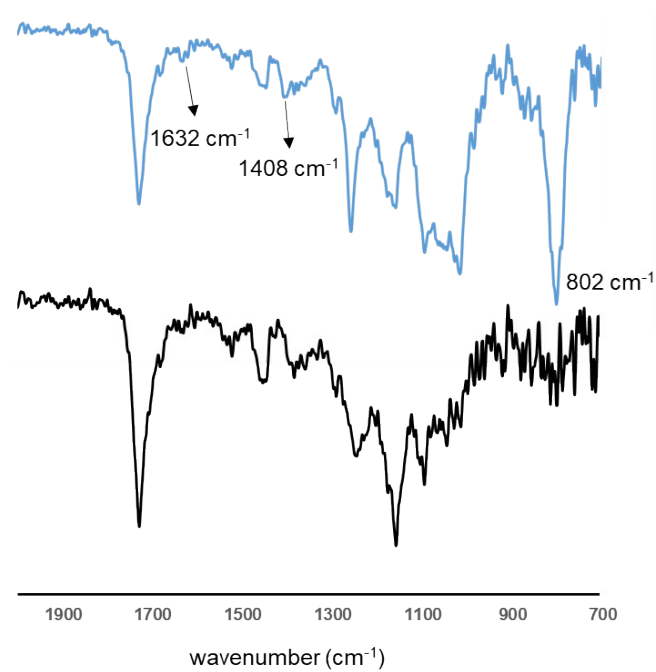

**Fig. S7.** FTIR spectra of the UVC-PSA tape (top) before and (bottom) after UV treatment.

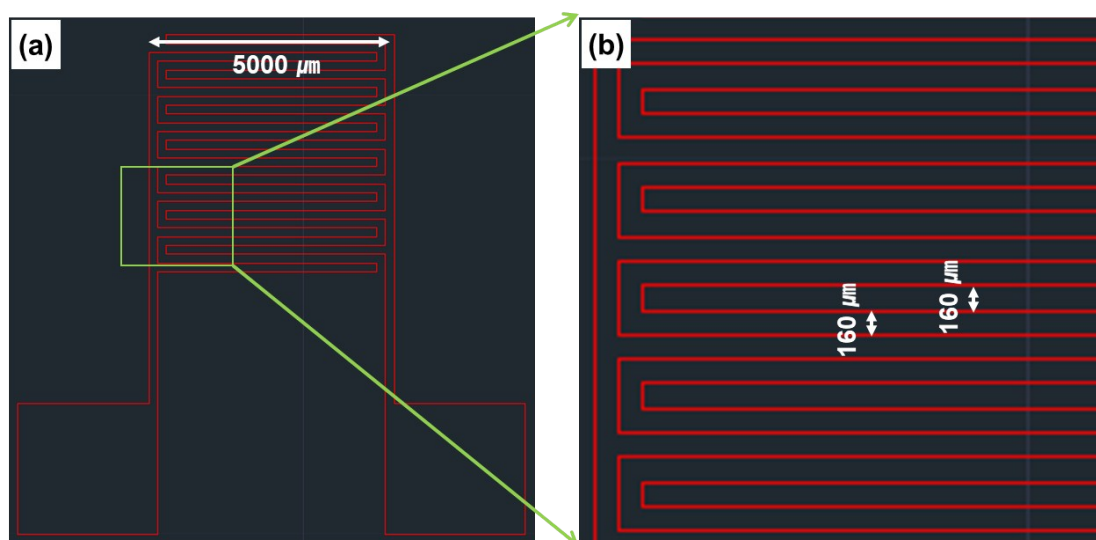

**Fig. S8.** (a) Capacitor design for the pressure sensor and (b) enlarged view of the boxed region in (a).

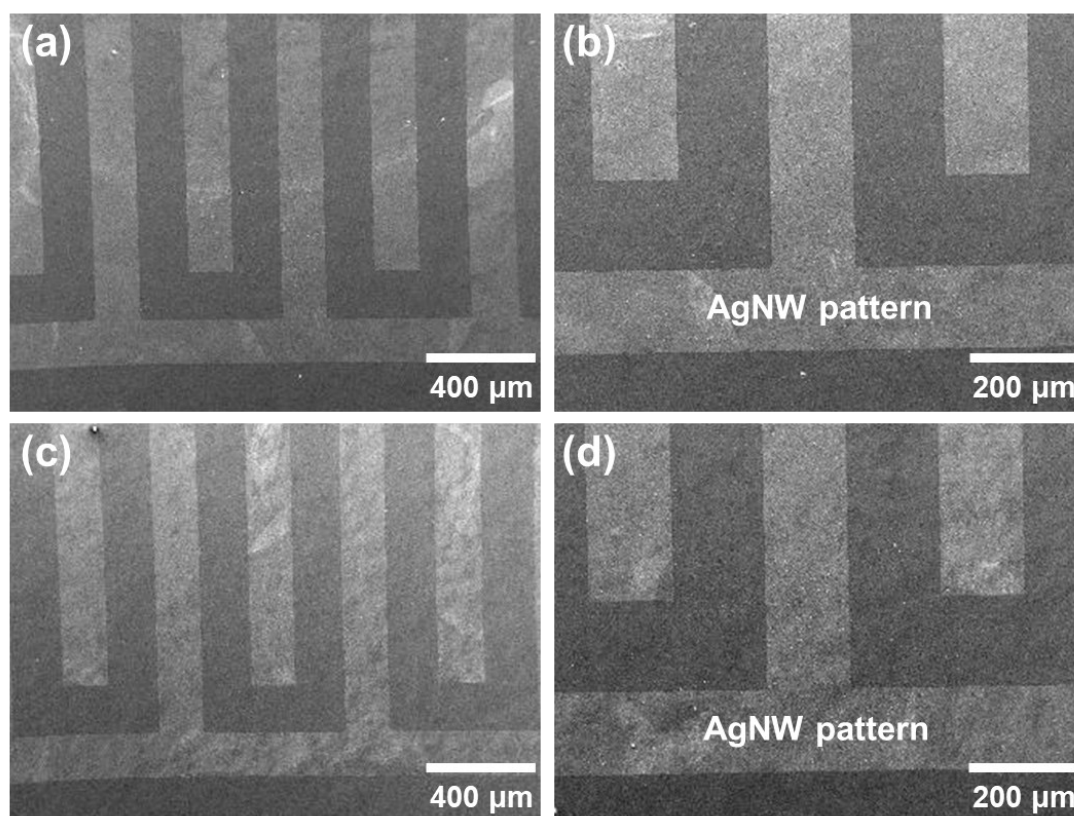

**Fig. S9.** (a), (b) AgNW circuits patterned according to a tandem compound electrode on a 1.4- $\mu$ m-thick PET before peeling from a carrier substrate. (c), (d) Those after peeling from the carrier with UV irradiation.

In order to form the tandem compound pattern using the AgNWs, high-precision AgNW patterning was required. Fortunately, because of the hydrophilic nature of the PET surface, the adhesion with AgNWs was sufficient to employ photolithography and etching to make a patterned AgNW structure. Figs. S9(a) and S9(b) show the patterned AgNWs on a 1.4- $\mu$ m-thick PET/UVC-PSA/thick PET, which was designed to generate the capacitance between the parallel AgNW-based lines. The important point here is that problems such as delamination or disconnection of AgNWs should not occur after peeling the 1.4- $\mu$ m-thick PET film from the carrier substrate after the

UV irradiation, and the resistance change of AgNW circuit should not be large. No new defects were found on the AgNW pattern after peeling, as shown in Figs. S9(c) and S9(d), and the resistance change of the AgNW circuit was measured to be less than 5%.

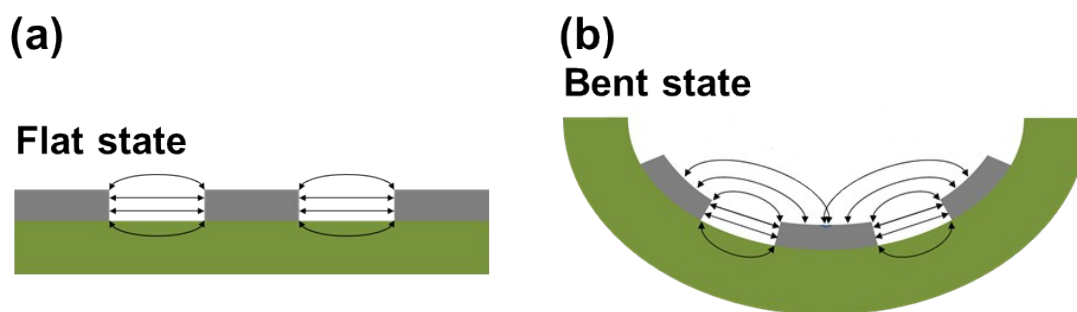

**Fig. S10.** Description of electromagnetic coupling between AgNW-based lines at (a) flat state and (b) bent state.

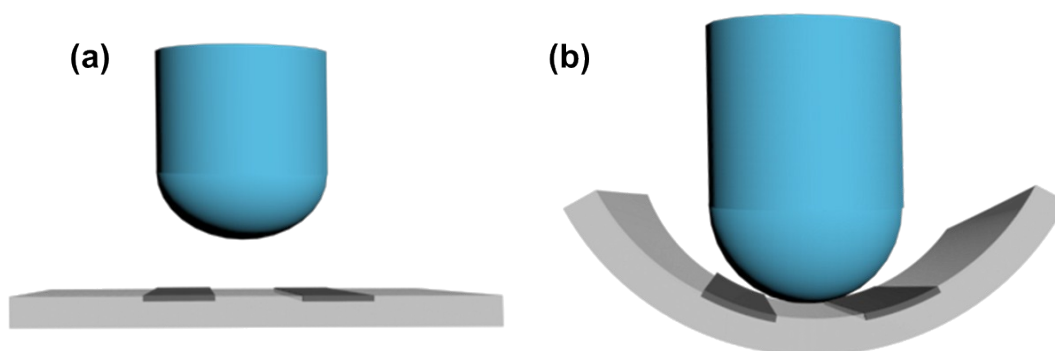

**Fig. S11.** Description for (a) before pressing and (b) after pressing an ultrathin sensor by a bar.
